# Supplementary material for: Intrinsic stability and oligomerization dynamics of DNA processivity clamps
Source: PubMed Central journal article supplement (PMC4041429; doi:10.1093/nar/gku255), 2014-04-09
Supplement: supp_gku255_nar-00356-h-2014-File005.pdf [file supp_gku255_nar-00356-h-2014-File005.pdf]

## Intrinsic stability and oligomerization dynamics of DNA processivity clamps

Jennifer K. Binder, Lauren G. Douma, Suman Ranjit, David M. Kanno, Manas Chakraborty, Linda B. Bloom and Marcia Levitus

### Supplementary Figure 1

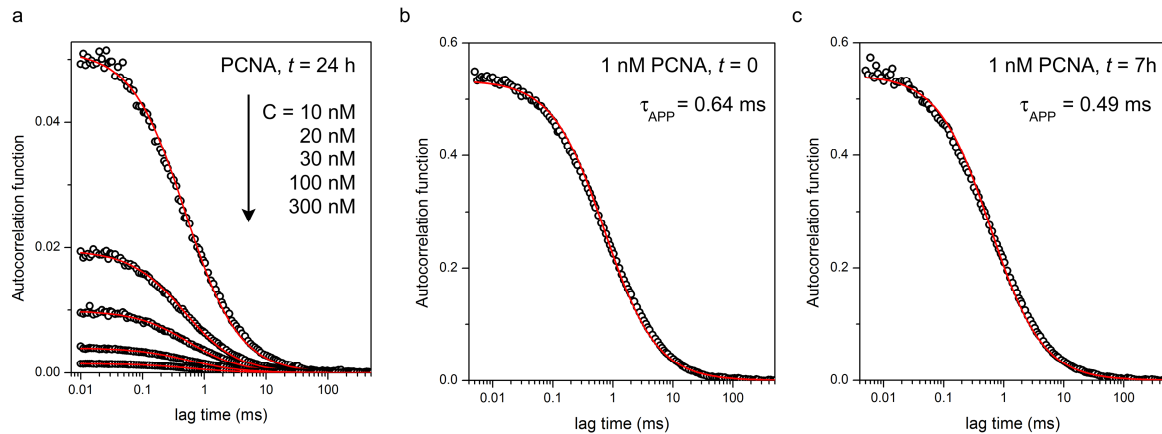

Examples of raw data and fitting curves. (a) FCS decays obtained with solutions of labeled PCNA that were prepared by diluting from a concentrated stock to the indicated final concentrations and equilibrating at room temperature for 24 h. The amplitudes of the decays are close to zero at concentrations above *ca.* 100 nM, and therefore experiments were performed by mixing labeled and unlabeled protein as indicated in the text. The apparent diffusion times ( $\tau_{APP}$ ) obtained by fitting these data with Eq. 1 (Materials and Methods) are  $\tau_{APP} = 0.49$  ms ( $C = 10$  nM), 0.47 ms ( $C = 20$  nM), 0.55 ms ( $C = 30$  nM), 0.57 ms ( $C = 100$  nM) and 0.60 ms ( $C = 300$  nM). We note that these values are similar to the ones reported in Fig. 2B, which were obtained with solutions containing mixtures of labeled and unlabeled protein. (b-c) FCS decays obtained with a 1 nM solution of labeled PCNA right after diluting from a concentrated stock ( $t = 0$ ) and after 7 h of incubation. The  $\tau_{APP}$  values shown in the figures were obtained by fitting the experimental data with Eq. 1.

## Intrinsic stability and oligomerization dynamics of DNA processivity clamps

Jennifer K. Binder, Lauren G. Douma, Suman Ranjit, David M. Kanno, Manas Chakraborty, Linda B. Bloom and Marcia Levitus

### Supplementary Figure 2

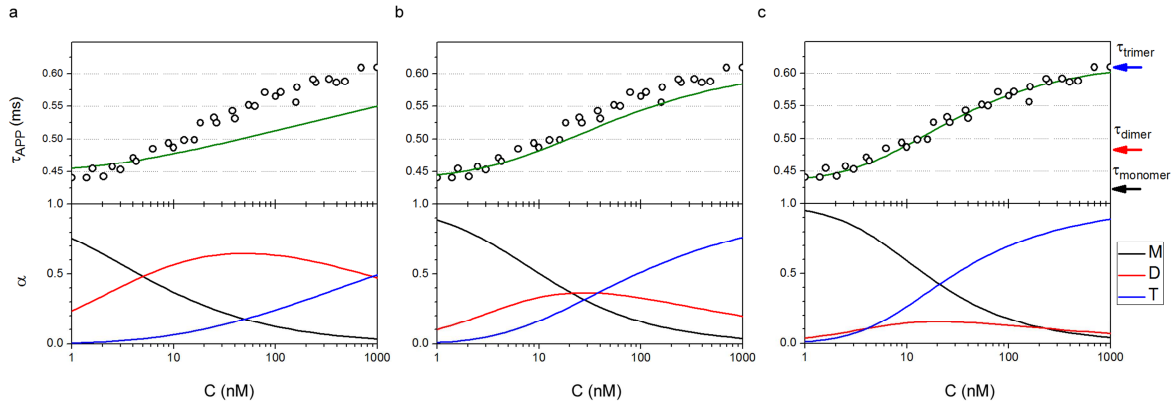

Analysis of the equilibrium data obtained with PCNA using a model that involves a dimeric intermediate. The black circles represent the  $\tau_{APP}$  values recovered from the FCS decays of PCNA solutions containing 50 mM NaCl equilibrated for 24 hours (from Fig. 2B). The arrows represent the diffusion times of the pure trimer, dimer and monomer. The solid lines were obtained through mathematical modeling as described in Materials and Methods using different  $K_{d1}$  ( $T \leftrightarrow D + M$ ) and  $K_{d2}$  ( $D \leftrightarrow 2M$ ) values. In all cases the values of  $K_{d1}$  and  $K_{d2}$  were constrained by the apparent dissociation constant for the trimer-monomer equilibrium measured experimentally:  $K_{d1}K_{d2} = K_d = 2,100 \text{ nM}^2$ . Panel (a):  $K_{d1} = 145 \text{ nM}$  and  $K_{d2} = 14.5 \text{ nM}$  ( $K_{d2} = K_{d1}/10$ ), panel (b):  $K_{d1} = 45.8 \text{ nM}$  and  $K_{d2} = 45.8 \text{ nM}$  ( $K_{d2} = K_{d1}$ ), and panel (c):  $K_{d1} = 14.5 \text{ nM}$  and  $K_{d2} = 145 \text{ nM}$  ( $K_{d2} = 10K_{d1}$ ). The fractional concentration profiles at the bottom of each graph were calculated as  $\alpha_1 = \frac{[M]}{3C}$  for the monomer,  $\alpha_2 = \frac{2[D]}{3C}$  for the dimer, and  $\alpha_3 = \frac{[T]}{C}$  for the trimer. Modeling shows that only values of  $K_{d2} \geq 10 K_{d1}$  fit the experimental data, and  $K_{d1} = 14.5 \text{ nM}$  and  $K_{d2} = 145 \text{ nM}$  give the highest concentration of dimer that is compatible with the experimental points.

## Intrinsic stability and oligomerization dynamics of DNA processivity clamps

Jennifer K. Binder, Lauren G. Douma, Suman Ranjit, David M. Kanno, Manas Chakraborty, Linda B. Bloom and Marcia Levitus

### Supplementary Figure 3

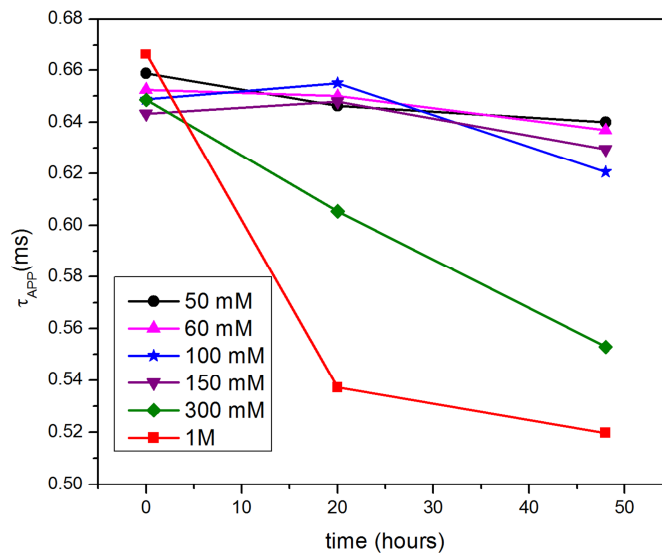

Apparent diffusion times ( $\tau_{APP}$ ) obtained from the FCS decays measured with 1nM  $\beta$  in Tris buffer containing the indicated concentrations of NaCl. The time axis indicates the incubation time.

## Intrinsic stability and oligomerization dynamics of DNA processivity clamps

Jennifer K. Binder, Lauren G. Douma, Suman Ranjit, David M. Kanno, Manas Chakraborty, Linda B. Bloom and Marcia Levitus

### Supplementary Figure 4

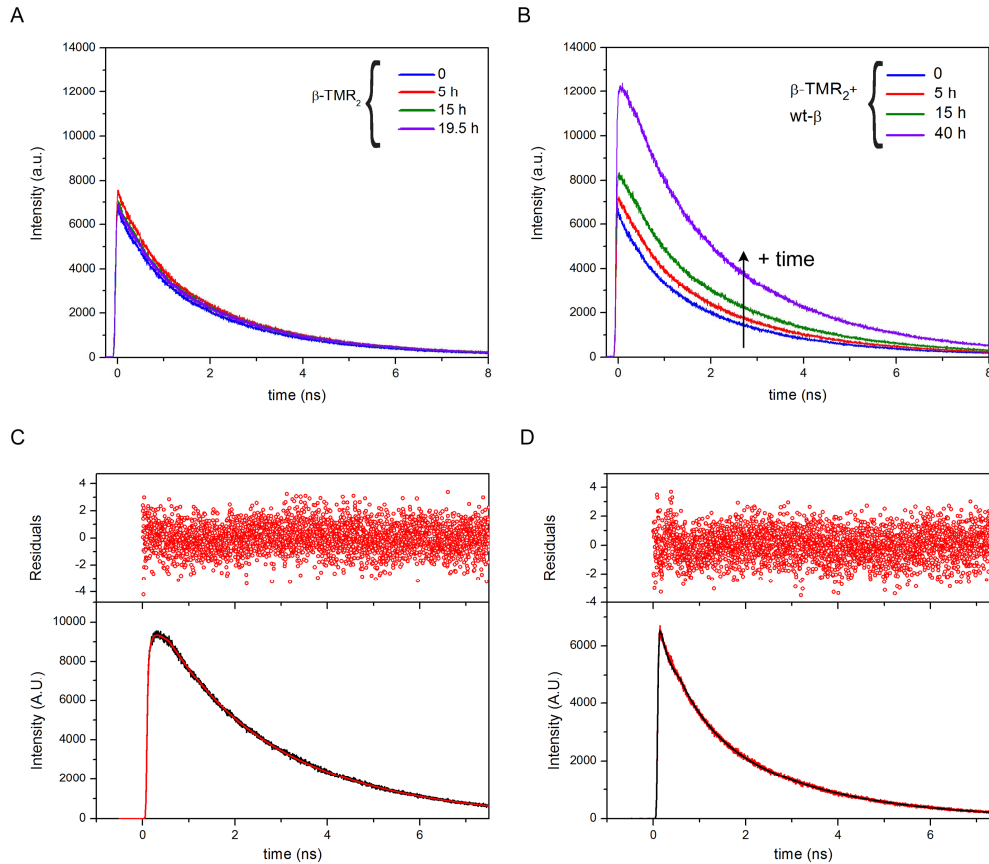

Time-resolved fluorescence decays of 0.36  $\mu$ M  $\beta$ -TMR<sub>2</sub> collected at different incubation times with (B) or without (A) 1.8  $\mu$ M wt- $\beta$ . No changes in intensity or lifetime were observed with  $\beta$ -TMR<sub>2</sub> alone (A), ruling out dimer dissociation and potential photobleaching artifacts. With wt- $\beta$  present (B), we observe an increase in the total number of collected photons over 40 h of incubation time due to subunit exchange. The normalized decays that correspond to these data are shown in Fig. 3B in the manuscript. The decay of  $\beta$ -TMR<sub>1</sub> (C) can be fitted with two lifetimes ( $\tau_1 = 2.7$  ns and  $\tau_2 = 1.1$  ns), while the decays of  $\beta$ -TMR<sub>2</sub> (D) require a third exponential term with  $\tau_3 = 0.093$  ns.
